# Supplementary material for: d-Mannose promotes recovery from experimental colitis by inducing AMPK phosphorylation to stimulate epithelial repair
Source: Royal Society of Chemistry journal article supplement (doi:10.1039/d3fo03146b), 2023-12-05

**Figure.3B**

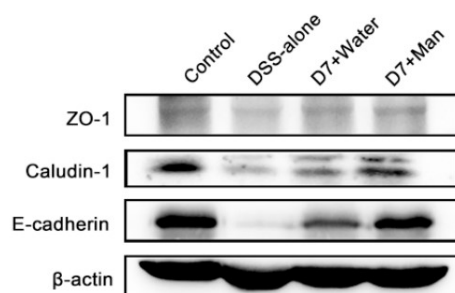

**Unedited figures in figure 3B**

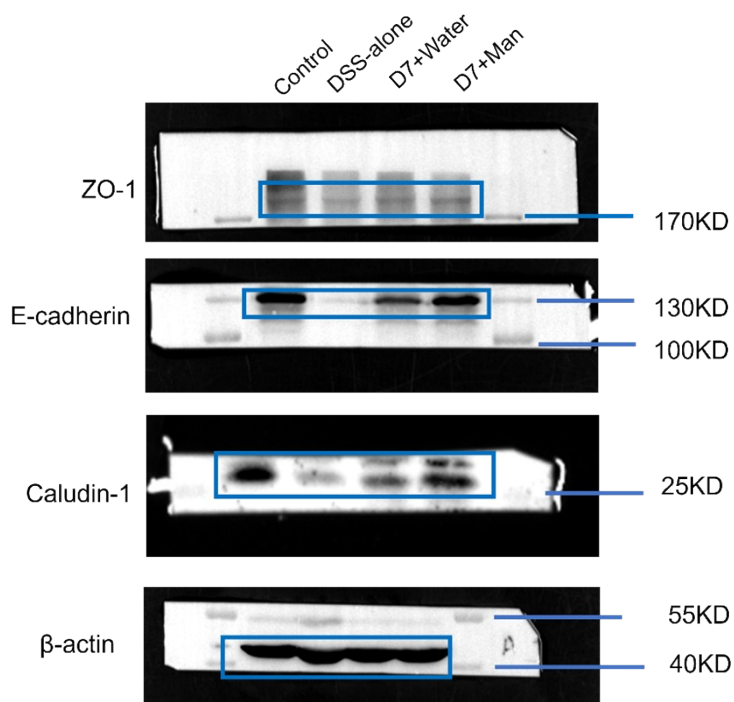

**Figure.4A**

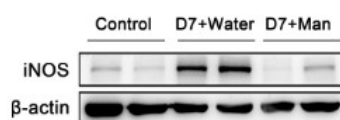

**Unedited figures in figure 4A**

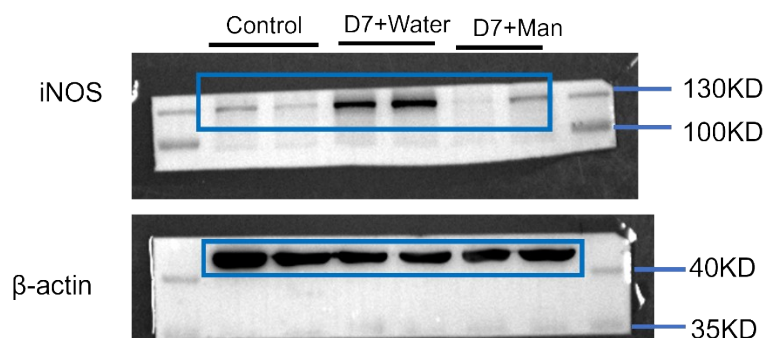

**Figure.5A**

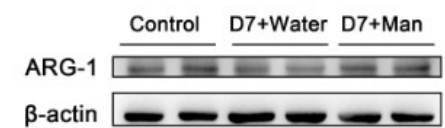

**Unedited figures in figure 5A**

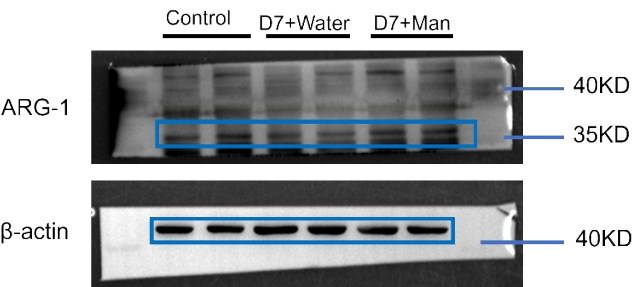

**Figure.6A**

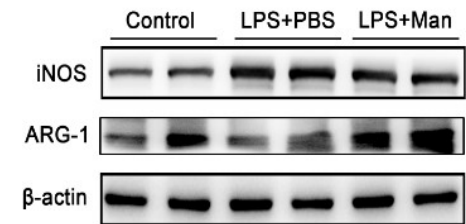

**Unedited figures in figure 6A**

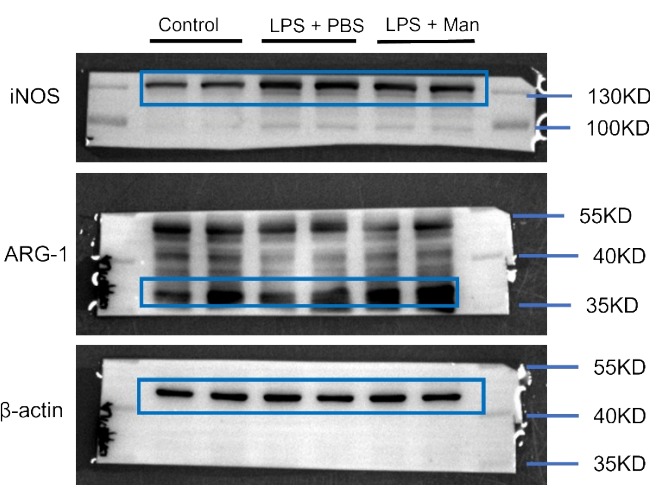

**Figure.7B**

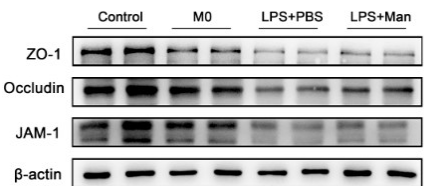

**Unedited figures in figure 7B**

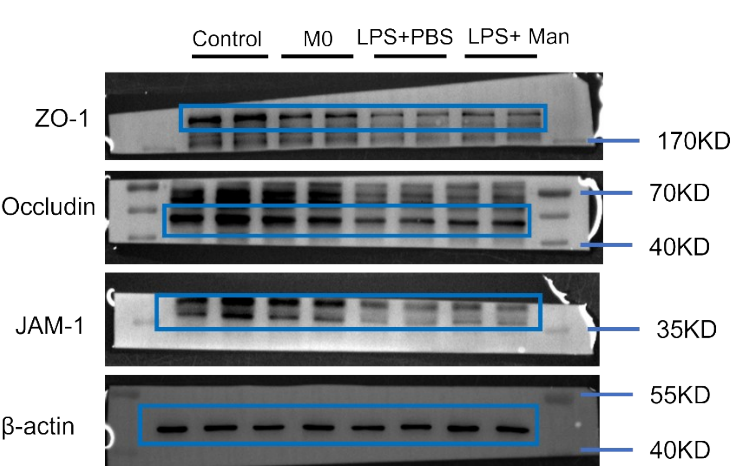

**Figure.8A**

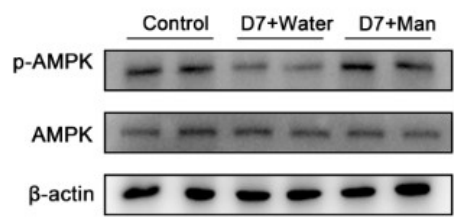

**Unedited figures in figure 8A**

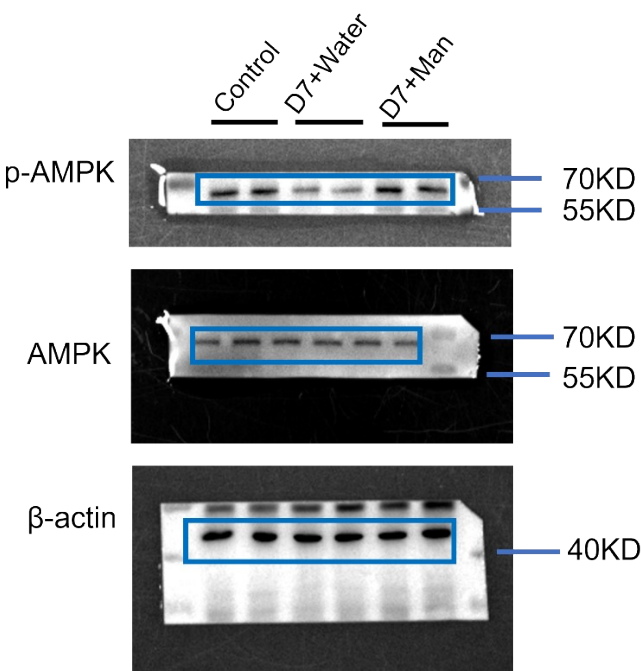

**Figure.8B**

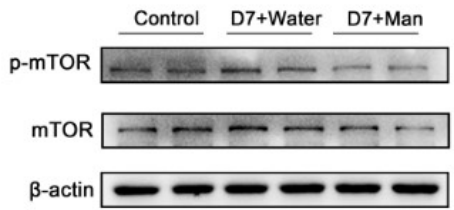

**Unedited figures in figure 8B**

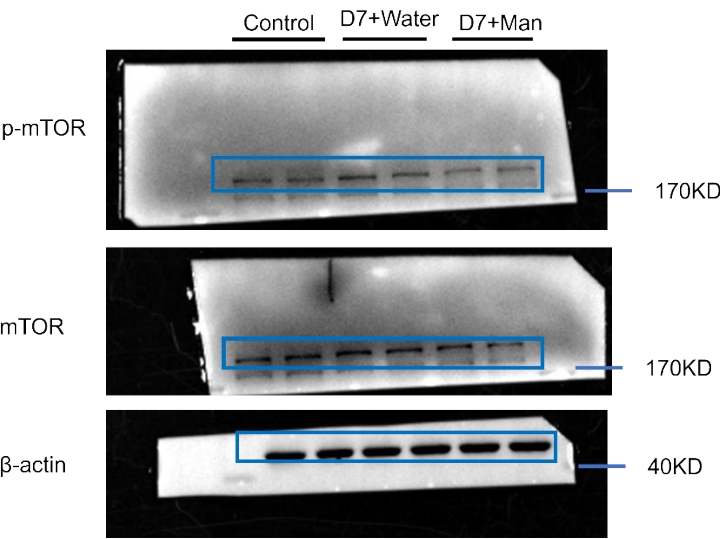

**Figure.8C**

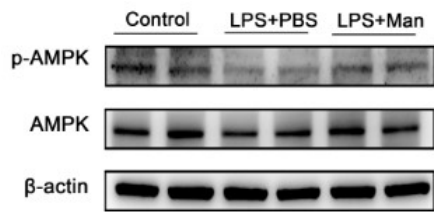

**Unedited figures in figure 8C**

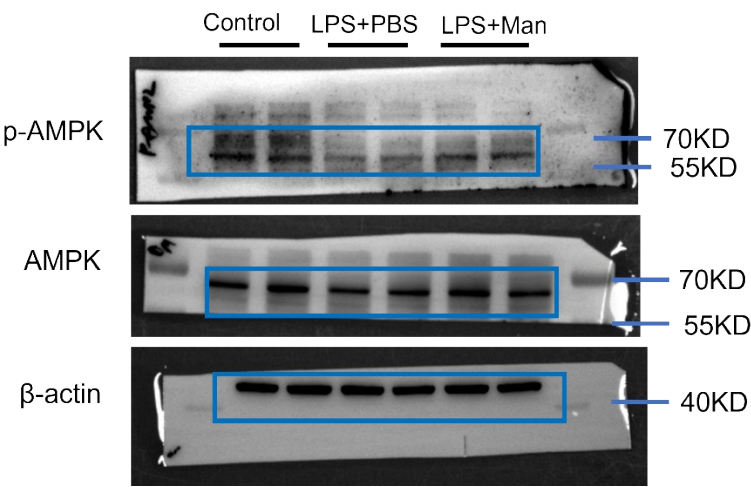

**Figure.8D**

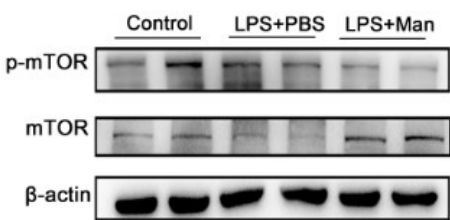

**Unedited figures in figure 8D**

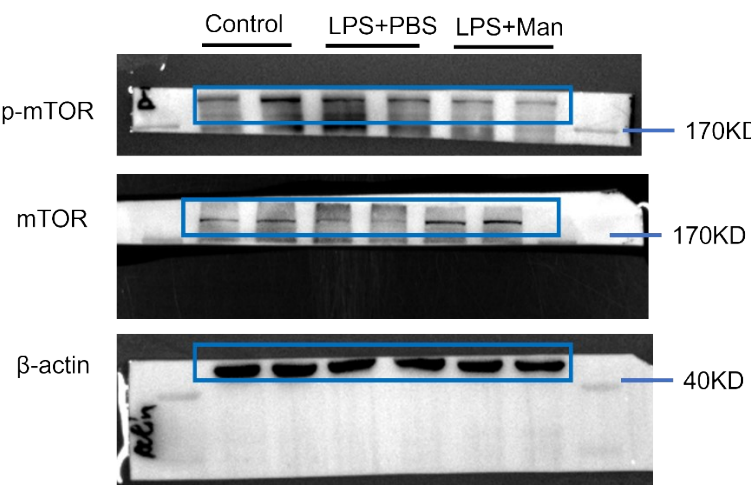

**Figure.9A**

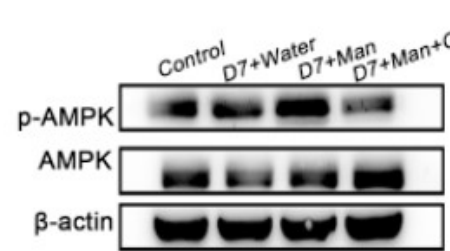

**Unedited figures in figure 9A**

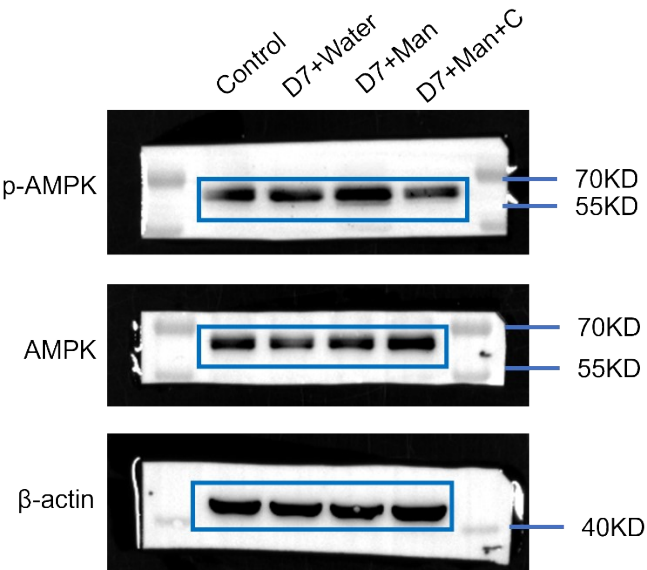

**Figure.9B**

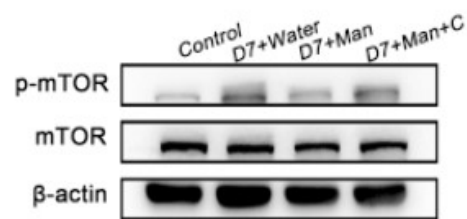

**Unedited figures in figure 9B**

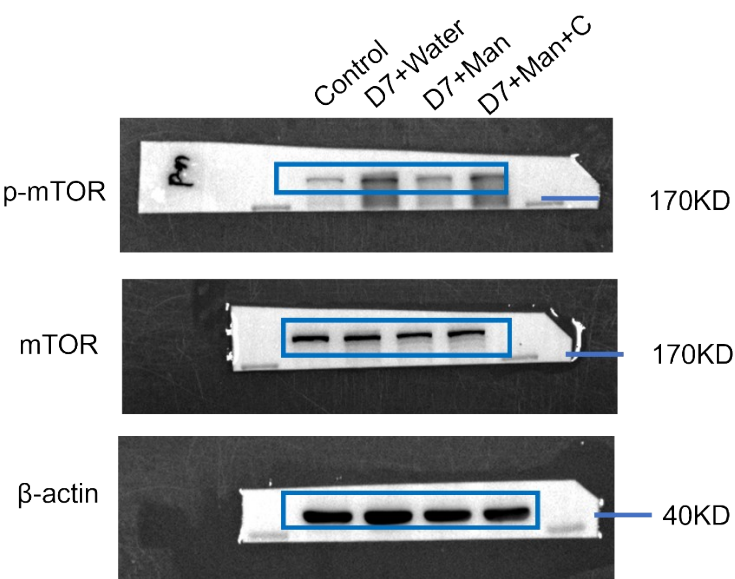

**Figure.9C**

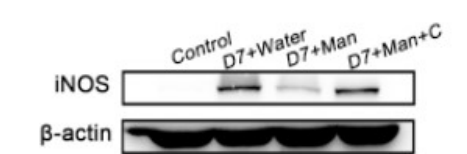

**Unedited figures in figure 9C**

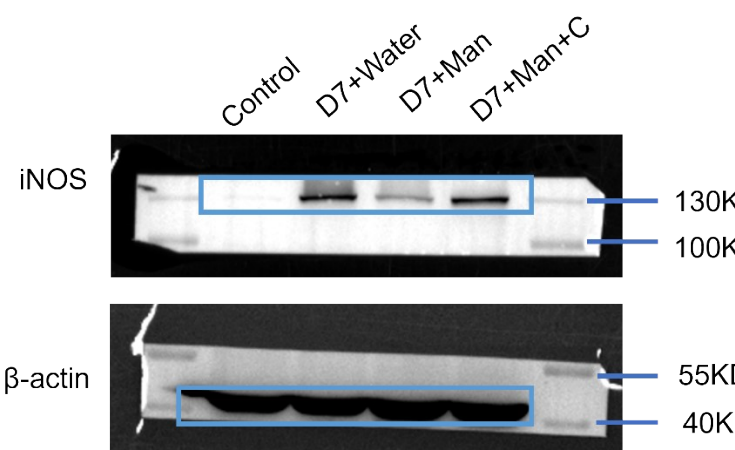

**Figure.9C**

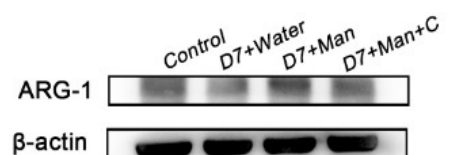

**Unedited figures in figure 9D**

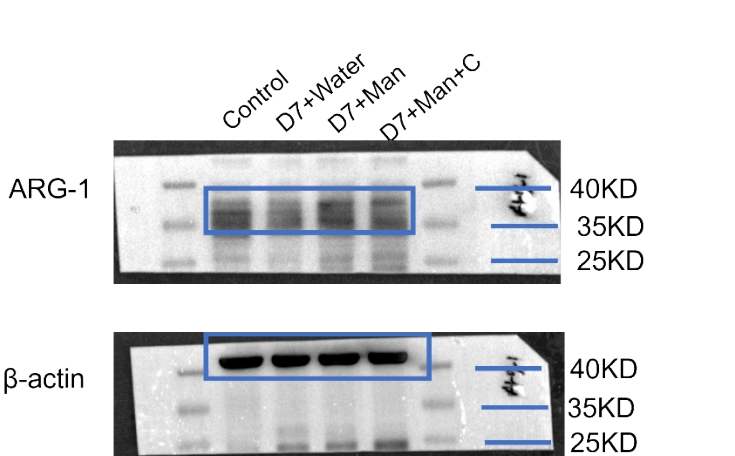

**Figure.11A**

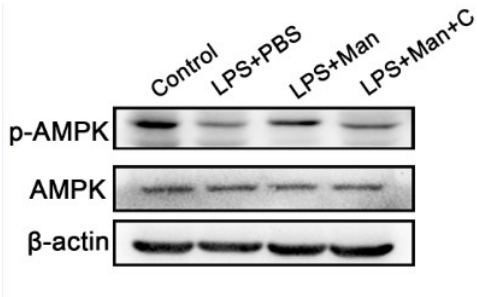

**Unedited figures in figure 11A**

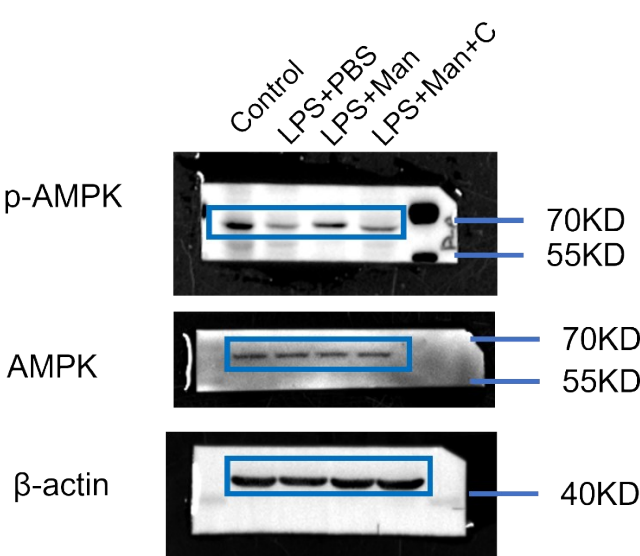

**Figure.11C**

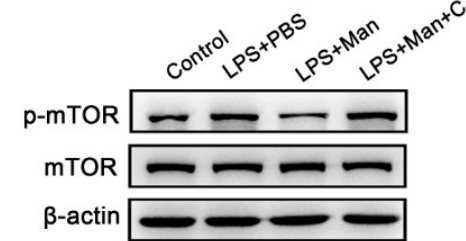

**Unedited figures in figure 11C**

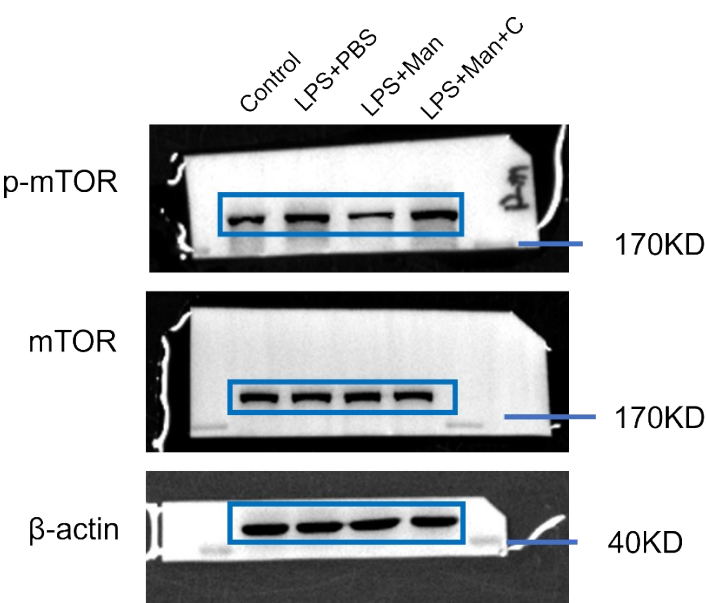



**Figure.11E**

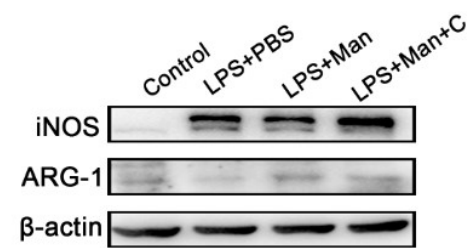

**Unedited figures in figure 11E**

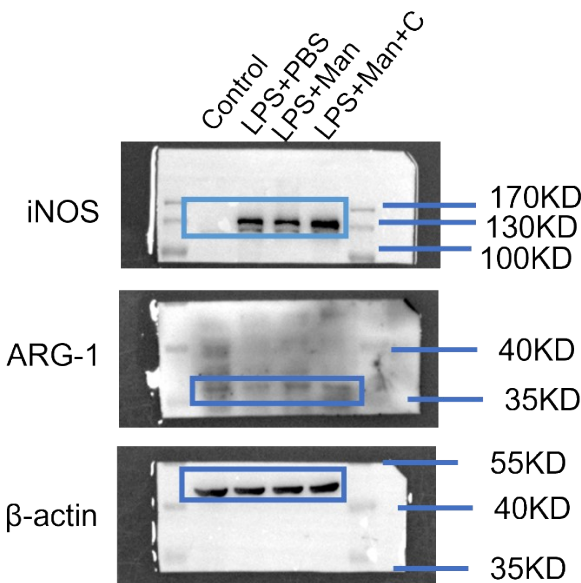

**Figure.12A**

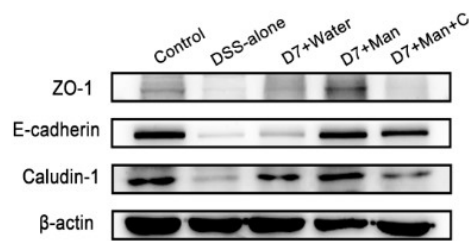

**Unedited figures in figure 12A**

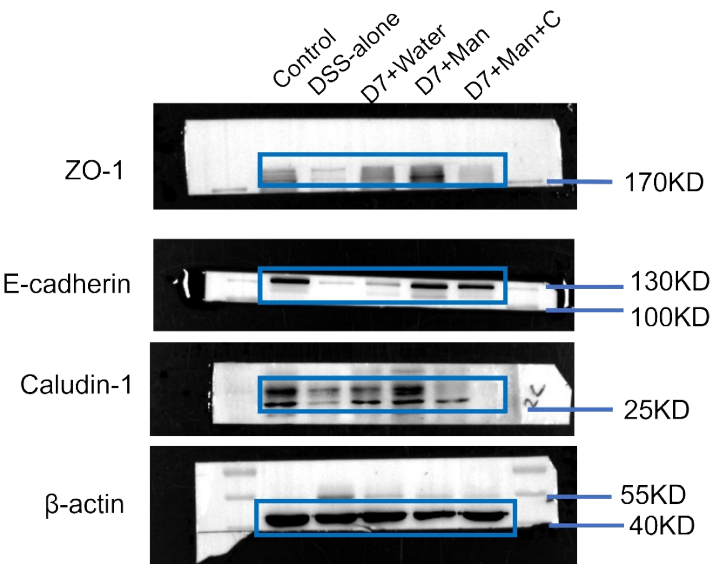

**Figure.12E**

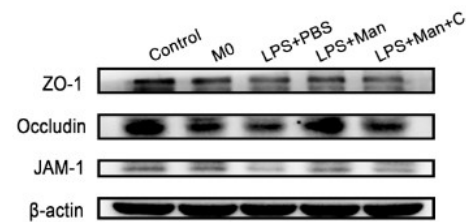

**Unedited figures in figure 12E**

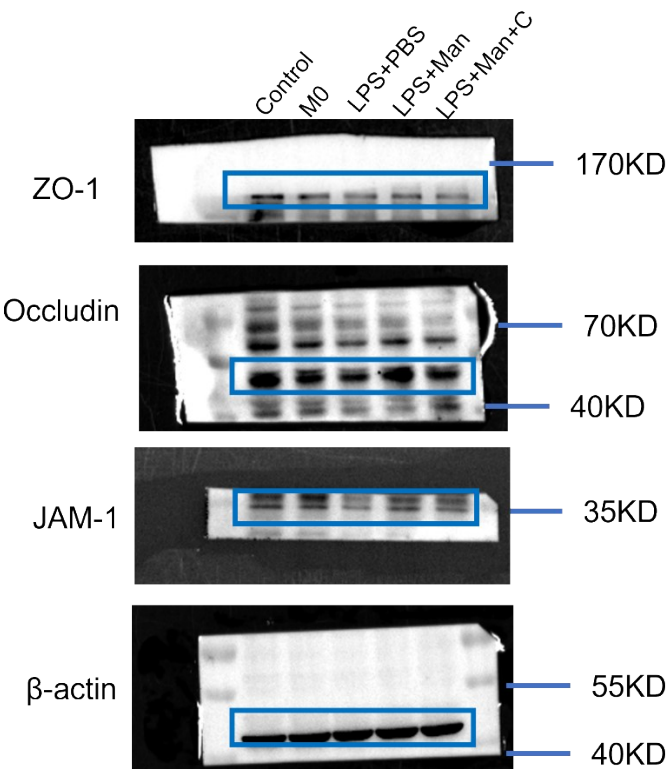

**Figure.13A**

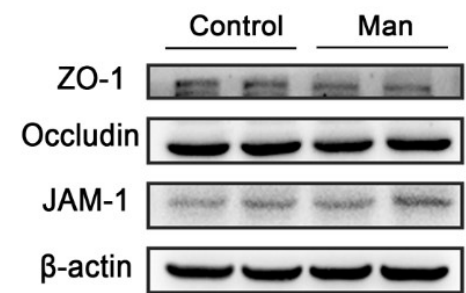

**Unedited figures in figure13A**

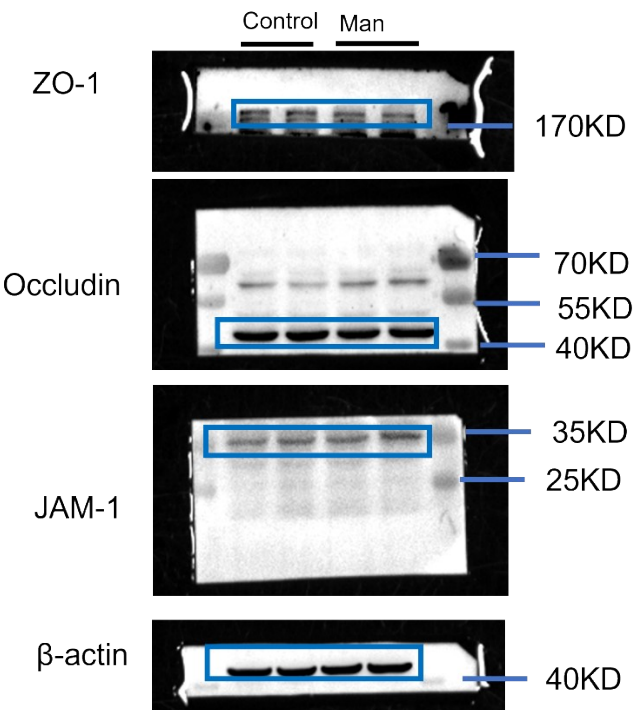



**Figure.13E**

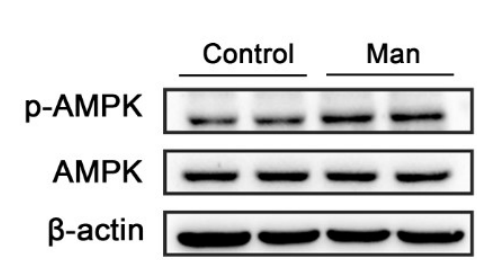

**Unedited figures in figure13E**

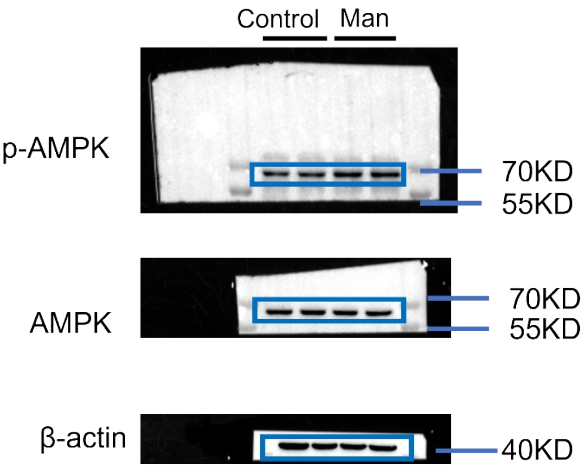

**Figure.13G**

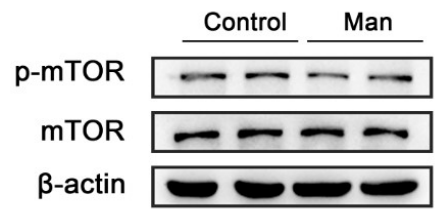

**Unedited figures in figure13G**

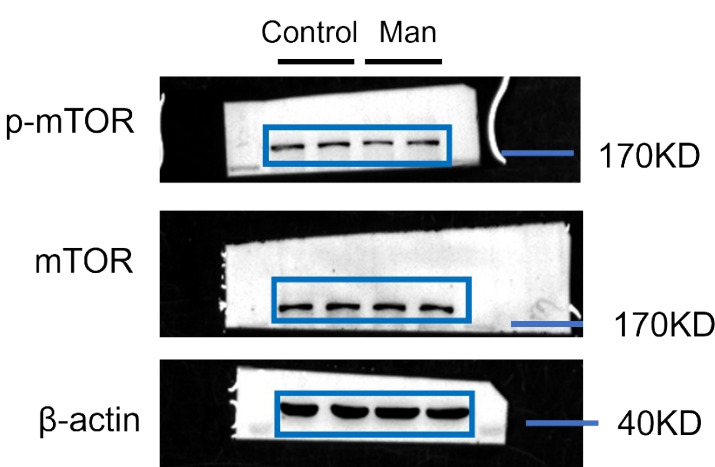

**Figure.14A**

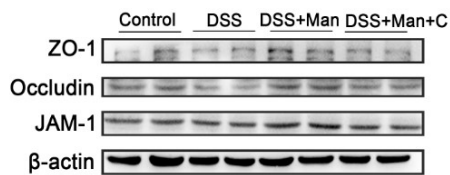

**Unedited figures in figure 14A**

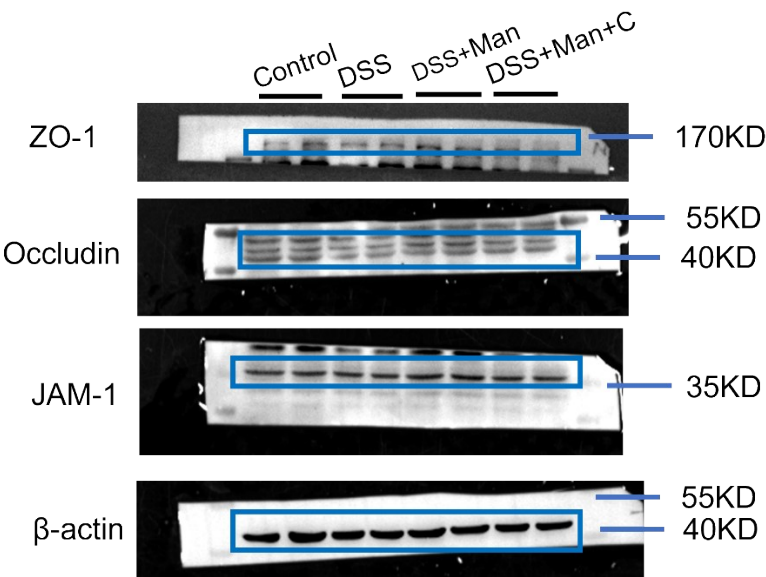

**Figure.14E**

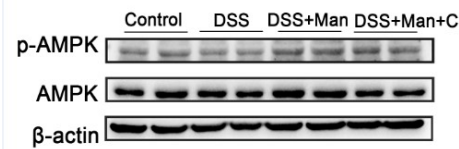

**Unedited figures in figure14E**

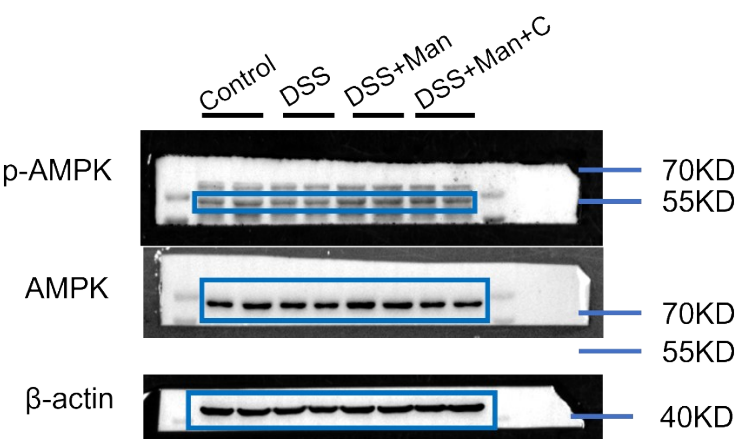

Figure.14G

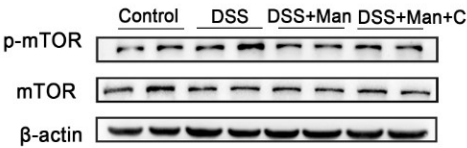

Figure.14G

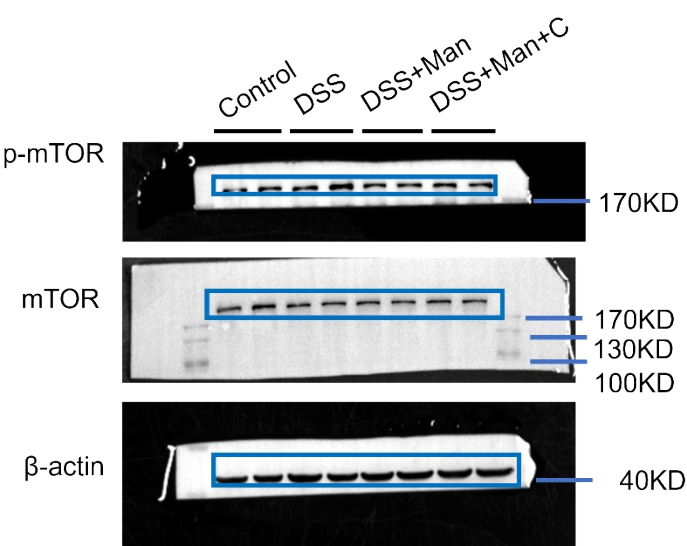

Supplement: d3fo03146b3.pdf [file d3fo03146b3.pdf]
