# Supplementary material for: d-Mannose promotes recovery from experimental colitis by inducing AMPK phosphorylation to stimulate epithelial repair
Source: Royal Society of Chemistry journal article supplement (doi:10.1039/d3fo03146b), 2023-12-05
Supplement: d3fo03146b1.xlsx [file d3fo03146b1.xlsx]

## Sheet: Figure1
Figure. 1B Colon length
Control	DSS-alone	D7+Water	D7+man
8.8	4.9	7.5	8.4
8.6	5.4	7.8	7.6
9.2	5.5	7.7	8.5
9	5.3	7.4	8.7
8.3	5.7	6.6	8.6
Figure. 1C DAI score
Days	Control					DSS-alone					D7+Water					D7+Man
	Mice 1	Mice 2	Mice 3	Mice 4	Mice 5	Mice 1	Mice 2	Mice 3	Mice 4	Mice 5	Mice 1	Mice 2	Mice 3	Mice 4	Mice 5	Mice 1	Mice 2	Mice 3	Mice 4	Mice 5
Day 0	0	0	0	0	0	0	0	0	0	0	0	0	0	0	0	0	0	0	0	0
Day 1	0	0	0	0	0	0	0.666667	0.666667	0.666667	0	0.666667	0	0.666667	0	0.333333	0.666667	0.666667	0	0.666667	1
Day 2	0	0	0	0	0	0.666667	0.666667	0.666667	0.666667	1	0.666667	1	1.33333	0.666667	1	0.666667	0.666667	1	1	1
Day 3	0	0	0	0.333333	0	1	1.66667	1	1	1.66667	1.66667	1.33333	1.66667	1.33333	1	1	1	1.66667	1.33333	1.33333
Day 4	0	0	0	0	0	1.33333	1.66667	1.66667	1.66667	2	1.66667	1.66667	2.33333	1.66667	1.66667	1.66667	1.66667	2	2	1.66667
Day 5	0	0	0	0	0	1.66667	2.33333	2	2.33333	2.66667	2.33333	2	3.33333	2	2	2	2.33333	2.66667	2	2
Day 6	0	0	0	0	0	2	2.33333	2.66667	3.33333	2.66667	2.33333	2.66667	3.33333	2.66667	2	2.66667	3.33333	2.66667	2.33333	2.33333
Day 7	0	0	0	0	0	2.66667	3	3	3.33333	2.66667	3	3.66667	4	3.66667	2.66667	3.66667	3	3	3	3
Day 8	0	0	0	0	0						3	4	4	4	3.33333	3.66667	3.33333	2.66667	3.33333	3
Day 9	0	0	0	0	0						3	4	3.66667	4	3.66667	3.66667	3	2.66667	3.33333	2.66667
Day 10	0	0	0	0	0						3	3.66667	3.66667	3.66667	4	3.66667	3.33333	3	3.33333	3
Day 11	0	0	0	0	0.333333						3.33333	4	4	4	3.66667	3.66667	3.66667	3.33333	3.33333	3.33333
Day 12	0	0	0	0	0						3.66667	3.66667	3.66667	4	3.66667	3.33333	3.33333	3	3	3
Day 13	0	0	0	0	0						3.66667	3.66667	4	3.33333	3.33333	3	3	2.66667	3.33333	3.33333
Day 14	0	0	0	0	0						3.66667	3.66667	3.66667	3.66667	3.33333	3	3	2.66667	3	3
Day 15	0	0	0	0	0						3	4	3.66667	3.33333	3	3	2.66667	2.33333	3	2.33333
Day 16	0	0	0	0	0						3	3.33333	3.66667	3.33333	3.33333	3	2.33333	2.33333	3	2
Day 17	0	0	0	0	0						2.66667	3.33333	3.33333	3.33333	2.33333	2.66667	2	1.66667	2.66667	1.66667
Day 18	0	0	0.333333	0	0						2	3.33333	3	3	2.33333	2.33333	1.66667	1.33333	2.66667	1.33333
Day 19	0	0	0	0	0						2.33333	4	2.66667	2.66667	2	2	1.33333	1.33333	2	1.33333
Day 20	0	0	0	0.333333	0.333333						1.66667	3.33333	2.66667	2.66667	2	0.666667	1	0.666667	1.66667	1
Day 21	0	0	0	0	0						1.66667	2.66667	2.33333	2	1.66667	1	1	0.666667	1.33333	1

## Sheet: Figure2
Figure. 2B CD45 immunoreactivity (aera% )
Control	DSS-alone	D7+Water	D7+Man
2.53549	12.0673	9.27593	7.37383
1.77131	15.5291	11.7453	3.00186
1.67378	13.4488	9.8776	4.15835
1.60795	12.7029	8.00155	5.84484
2.08913	17.0434	9.53719	5.81787
Figure. 2C MPO (U/g）
Control	DSS-alone	D7+Water	D7+Man
0.061947	0.321441	0.129156	0.13485
0.073238	0.179941	0.153073	0.083132
0.079646	0.234854	0.253385	0.0967552
0.091899	0.361678	0.121842	0.110914
0.152876	0.289312	0.174747	0.0793409
Figure. 2D IL-1β (ng/g protin)
Control	DSS-alone	D7+Water	D7+Man
71.5388	280.173	140.086	125.185
54.6503	292.094	146.047	102.336
75.5126	250.37	151.014	88.4274
68.5585	276.199	195.719	76.5061
59.6175	302.029	137.117	138.1
Figure. 2E TNF-α (ng/g protin)
Control	DSS-alone	D7+Water	D7+Man
392.483	713.645	531.493	282.234
306.201	670.504	488.352	339.755
325.375	651.33	445.211	306.408
354.136	579.428	497.939	320.582
301.408	632.156	426.038	330.168
Figure. 2F TGF-β (ng/g protin)
Control	DSS-alone	D7+Water	D7+Man
30.7826	9.47826	16	19.4783
27.7391	12.9565	13.3913	21.2174
35.1304	9.91304	11.6522	23.3913
28.6087	3.82609	14.6957	21.6522
32.087	6.86956	12.087	19.0435
Figure. 2G IL-10 (ng/g protin)
Control	DSS-alone	D7+Water	D7+Man
43.23	23.39	24.06	30.26
31.28	18.02	27.43	42.77
40.73	16.71	24.57	30.14
42.89	19.44	20.17	26.02
47.95	14.68	23.7	33.24

## Sheet: Figure3
Figure. 3A Serum FITC-Dextran (μg/ml)
Control	DSS-alone	D7+Water	D7+Man
0.128797	5.44665	0.868469	0.272284
0.186531	2.64904	0.402796	0.22792
0.219992	3.01209	0.447518	0.221611
0.144351	3.18156	0.41513	0.276765
0.160601	3.16838	0.35444	0.227035
Figure. 3C ZO1/ β-actin (Percentage of control group)
Control	DSS-alone	D7+Water	D7+Man
1.02531	0.247496	0.71459	0.899274
0.929392	0.201275	0.563917	0.8689
1.0453	0.184573	0.748054	0.966871
Figure. 3D Claudin/ β-actin (Percentage of control group)
Control	DSS-alone	D7+Water	D7+Man
0.979742	0.046157	0.34508	0.860256
1.02367	0.078545	0.373888	0.89215
0.996593	0.086608	0.655553	0.93794
Figure. 3E E-cadherin/ β-actin (Percentage of control group)
Control	DSS-alone	D7+Water	D7+Man
1.00219	0.077072	0.444472	0.842283
1.0274	0.049836	0.616105	0.952467
0.970406	0.051399	0.411697	0.829093

## Sheet: Figure4
Figure. 4B iNOS// β-actin (Percentage of control group)
Control	D7+Water	D7+Man
1.02087	4.90624	0.975314
0.902267	4.86421	0.811635
1.00701	5.07642	1.12432
0.849341	6.25325	1.93137
1.16923	6.2495	1.78973
1.05128	6.46446	2.22749
Figure. 4C inos mRNA(fold change)
Control	D7+Water	D7+Man
0.58332	9.33312	1.19115
0.374324	10.8706	1.34944
1.44629	20.006	4.14784
1.32167	5.98918	3.36909
1.62716	5.86593	4.53895
0.647234	18.9268	7.17192
Figure. 4E CD86+F4/80+ Cells %
Control	D7+Water	D7+Man
1.13	4.94	2.4
2.25	4.95	2.71
1.49	4.41	2.83

## Sheet: Figure5
Figure. 5B ARG1/ β-actin (Percentage of control group)
Control	D7+Water	D7+Man
0.812333	0.602777	0.883383
0.78303	0.57091	0.858281
1.13857	0.842206	1.14489
1.02229	0.584359	0.929692
0.968132	0.553306	0.980544
1.27565	0.862134	1.17792
Figure. 5C arg-1 mRNA (fold change)
Control	D7+Water	D7+Man
1.32798	0.196042	0.81182
0.846294	0.248141	1.25634
0.510234	0.570078	1.93084
0.731653	0.590182	0.864077
1.85219	0.307622	0.593172
0.734851	0.137665	1.00642
Figure. 5E CD206+F4/80+ Cells %
Control	D7+Water	D7+Man
1.42	4.13	6.19
1.56	4.99	7.17
2.31	2.83	6.11

## Sheet: Figure6
Figure. 6B iNOS/ β-actin (Percentage of control group)
Control	LPS+PBS	LPS+Man
1.01975	1.67677	1.5916
0.791025	1.63391	1.65727
0.978067	1.67803	1.61591
1.12991	2.0646	1.4547
0.990148	2.00796	1.69151
1.0911	2.04609	1.49961
Figure. 6C ARG1/ β-actin (Percentage of control group)
Control	LPS+PBS	LPS+Man
1.03561	0.443639	1.21106
1.03044	0.44185	1.38157
1.06926	0.469146	1.18995
0.974586	0.539175	1.46426
0.924246	0.528641	1.87167
0.965864	0.546397	1.57819
Figure. 6D il-1β mRNA (fold change)
Control	LPS+PBS	LPS+Man
1.17207	1.95756	1.02035
0.800547	2.96711	1.10884
0.773277	1.60109	1.07852
0.992444	1.62344	1.49387
0.746937	1.80132	1.14002
1.51473	1.73996	1.23034
Figure. 6E tnf-α mRNA (fold change)
Control	LPS+PBS	LPS+Man
0.804841	2.03747	0.997767
1.13822	1.53344	0.943945
0.950511	1.66645	1.30747
0.924519	1.62088	1.77372
1.0117	1.84904	0.756166
1.17022	1.91424	1.72521
Figure. 6F inos mRNA (fold change)
Control	LPS+PBS	LPS+D-mannose
1.05041	3.94754	1.6032
1.02879	2.55081	3.27377
0.920796	3.05454	2.49831
1.00549	3.99417	2.82431
1.13123	2.86373	2.59889
0.863278	4.10646	2.39147
Figure. 6G cd206 mRNA (fold changed)
Control	LPS+PBS	LPS+D-mannose
0.999466	0.691556	1.53248
1.11808	0.844413	1.0146
0.946554	0.700465	1.02518
0.914311	0.802034	1.43037
0.853082	0.70169	1.33458
1.16851	0.762551	1.17804
Figure. 6H tgf-β mRNA (fold change)
Control	LPS+PBS	LPS+D-mannose
1.21139	0.744864	0.967077
0.990796	0.671309	1.12301
0.905421	0.600838	1.1608
0.798325	0.588473	1.46504
0.982776	0.662067	2.15853
1.11129	0.750045	1.32709

## Sheet: Figure7
Figure. 7C ZO1/ β-actin (Percentage of control group) in NCM460 Cells
Control	M0	LPS+PBS	LPS+Man
0.923212	0.992107	0.603436	0.633367
0.924645	0.917724	0.467561	0.534439
0.965931	1.01157	0.607577	0.637803
1.05154	0.851794	0.587325	0.692062
1.03541	0.74811	0.464563	0.682018
1.09926	0.85973	0.582165	0.7438
Figure. 7D Oocludin/ β-actin (Percentage of control group) in NCM460 Cells
Control	M0	LPS+PBS	LPS+Man
0.9177	0.879983	0.634429	0.666499
0.955949	0.842239	0.641326	0.610461
0.871163	0.806791	0.597803	0.651217
1.11802	1.04967	0.543068	0.852847
1.08959	1.01221	0.546757	0.771212
1.04757	1.05727	0.535593	0.739002
Figure. 7E JAM-1/ β-actin (Percentage of control group) in NCM460 Cells
Control	M0	LPS+PBS	LPS+Man
0.789842	0.87939	0.40185	0.61211
0.877902	1.0474	0.585473	0.632468
0.78786	0.90607	0.469384	0.694981
1.16886	0.806891	0.450264	0.607141
1.21229	1.00871	0.562057	0.727431
1.16325	0.840459	0.574366	0.639579
Figure. 7F FITC-Dextran fluorescence (% of control )
Control	M0	LPS+PBS	LPS+Man
116	114	157	134
97	95	147	133
89	111	150	123

## Sheet: Figure 8
Figure. 8A pAMPK/AMPK (Percentage of control group)
Control	D7+Water	D7+Man
1.12202	0.542047	1.1719
1.11941	0.47399	1.03336
1.54489	0.558235	1.35106
0.788668	0.573171	1.46488
0.669208	0.585921	1.13492
0.755805	0.671195	1.85241
Figure. 8B p-mTOR/mTOR (Percentage of control group)
Control	D7+Water	D7+Man
1.04886	1.20845	1.16159
1.12301	1.34193	1.23409
1.21942	1.4883	1.32923
0.838546	1.2946	1.06748
0.817441	1.37052	1.14067
0.952716	1.56914	1.12621
Figure. 8C pAMPK/AMPK (Percentage of control group)
Control	LPS+PBS	LPS+Man
1.10431	0.512636	0.620208
1.09538	0.482716	0.599859
1.08838	0.503388	0.625077
0.90092	0.562663	0.712845
0.893927	0.556073	0.745464
0.917075	0.564146	0.702009
Figure. 8D p-mTOR/mTOR (Percentage of control group)
Control	LPS+PBS	LPS+Man
1.30522	1.99562	0.730921
1.08862	1.90516	0.62435
1.30474	1.93552	0.761066
0.761156	1.54341	0.998866
0.775942	1.35789	0.872104
0.764327	1.5494	0.986837

## Sheet: Figure9
Figure. 9A pAMPK/AMPK (Percentage of control group)
Control	D7+Water	D7+Man	D7+Man+C
0.889003	0.454138	0.928531	0.429478
0.886938	0.464241	0.818758	0.375555
1.22406	0.531805	1.07048	0.442304
Figure. 9B p-mTOR/mTOR (Percentage of control group)
Control	D7+Water	D7+Man	D7+Man+C
0.927837	1.14523	0.944309	1.06902
0.993437	1.21239	1.00906	1.1871
1.07872	1.38809	0.996262	1.31658
Figure. 9C iNOS/ β-actin (Percentage of control group)
Control	D7+Water	D7+Man	D7+Man+C
0.957927	5.86771	1.8123	4.60375
0.944928	5.8642	1.67939	4.56431
1.09715	6.06591	2.09016	4.76344
Figure. 9D ARG1/ β-actin (Percentage of control group)
Control	D7+Water	D7+Man	D7+Man+C
0.891389	0.661439	0.983383	0.641229
0.859234	0.626471	0.858281	0.607154
1.24938	0.584359	1.14489	0.553306
Figure. 9F CD86+ F4/80+ Cells%
Control	D7+Water	D7+Man	D7+Man+C
1.67	5.94	2.85	4.18
2.25	4.95	2.71	5.43
1.49	4.41	2.83	5.01
Figure. 9H CD206+ F4/80+ Cells%
Control	D7+Water	D7+Man	D7+Man+C
1.71	4.13	7.66	3.86
1.42	4.6	6.11	2.89
2.31	2.93	6.19	4.17

## Sheet: Figure 11
Figure. 11B pAMPK/AMPK (Percentage of control group)
Control	LPS+PBS	LPS+Man	LPS+Man+C
1.00241	0.642928	1.39516	1.11364
1.15132	0.704713	1.56549	1.14055
0.846269	0.633755	1.27987	0.99878
Figure. 11D p-mTOR/mTOR (Percentage of control group)
Control	LPS+PBS	LPS+Man	LPS+Man+C
1.07827	1.5375	0.912	1.69191
1.03399	1.48231	0.928952	1.60487
0.887739	1.3744	1.0438	1.53875
Figure. 11F iNOS/ β-actin (Percentage of control group)
Control	LPS+PBS	LPS+Man	LPS+Man+C
1.02699	8.30476	7.35818	8.89371
0.786402	8.4007	7.24509	9.14829
1.18661	8.50029	7.78037	9.01687
Figure. 11G ARG1/ β-actin (Percentage of control group)
Control	LPS+PBS	LPS+Man	LPS+Man+C
0.925639	0.674427	1.00725	0.808262
0.983073	0.654916	1.0179	0.858448
1.09129	0.742749	1.21064	0.865968

[truncated: 4 more sheets: Figure12, Figure13, Figure14, Figure 15]
